# Supplementary material for: Fabrication of CdTe nanoparticles-based superparticles for an improved detection of Cu2+and Ag+
Source: Royal Society of Chemistry journal article supplement (doi:10.1039/c1jm14215a), 2011-12-17
Supplement: c1jm14215a.pdf [file c1jm14215a.pdf]

## Supporting Information:

### **Fabrication of CdTe Nanoparticles-based Superparticles for an Improved Detection of Cu<sup>2+</sup> and Ag<sup>+</sup>**

*Jishu Han,<sup>a</sup> Xue Zhang,<sup>a</sup> Yubing Zhou,<sup>a</sup> Yang Ning,<sup>a</sup> Jie Wu,<sup>a</sup> Sen Liang,<sup>a</sup> Hongchen Sun,<sup>b</sup> Hao Zhang,<sup>\*a</sup> and Bai Yang<sup>a</sup>*

*<sup>a</sup> State Key Laboratory of Supramolecular Structure and Materials, College of Chemistry, Jilin University, Changchun 130012, P. R. China*

*<sup>b</sup> School of Stomatology, Jilin University, Changchun 130041, P. R. China*

*E-mail: hao\_zhang@jlu.edu.cn*

**Figure S1.** Evolution of the PL emission spectra of MPA-stabilized CdTe NPs during reflux of the precursor solutions at 100 °C for 2 hour (solid), 4 hour (dash), 10 hours (dot), and 18 hours (dash dot). The average size of CdTe NPs with corresponding emission colors was 3.5 nm, 3.8 nm, 4.5 nm, 5.0 nm, which was calculated from TEM images. Inset: fluorescence photographs of NP solutions corresponding to the PL spectra.

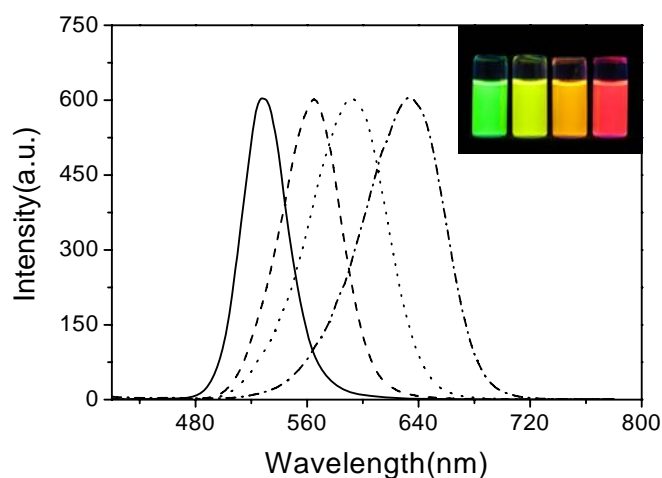

**Figure S2.** XRD patterns of MPA-stabilized aqueous CdTe NPs and the as-prepared unitary SPs. The corresponding TEM images were indicated in Figure 2.

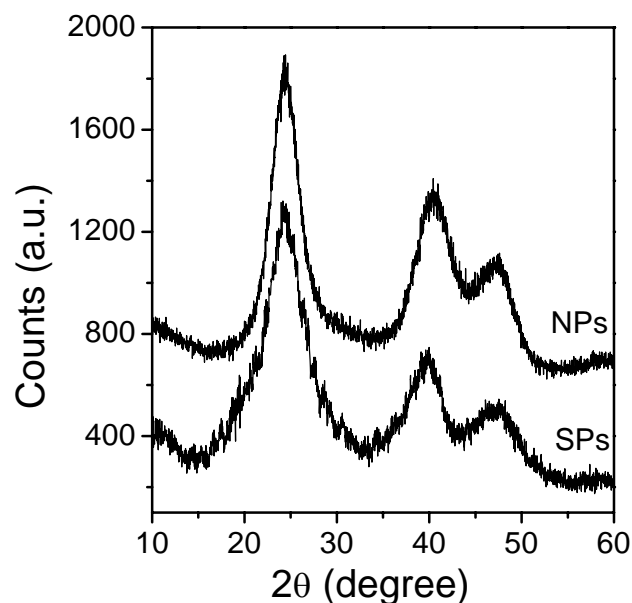

**Figure S3.** XPS Cd 3d and Te 3d spectra of the as-prepared CdTe SPs.

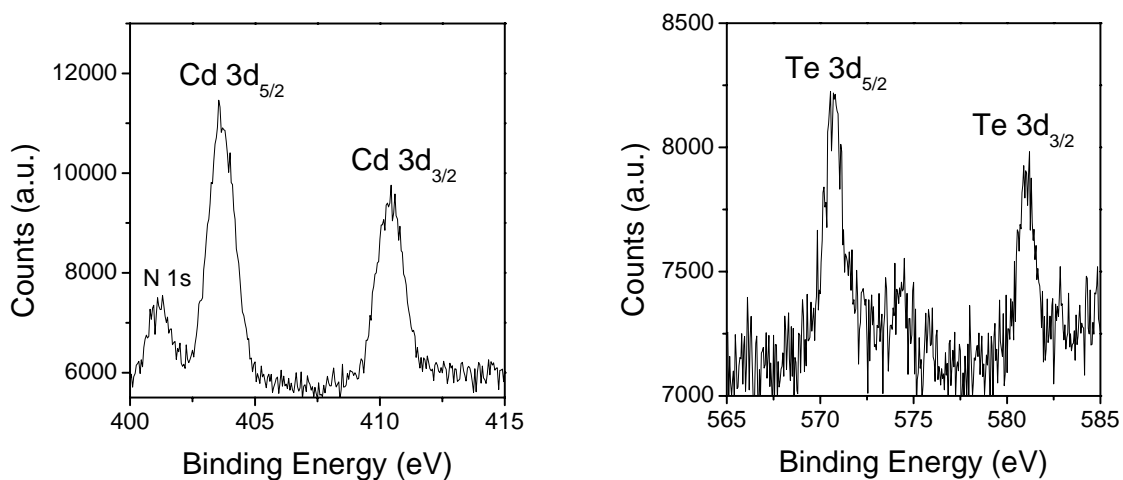

**Table S1.** The calculated Cd/Te molar ratio of MPA-stabilized CdTe NPs in water, DDAB-stabilized NPs in chloroform, and DTAB-capped SPs in water, which was determined by the XPS measurement.

|       | MPA-stabilized<br>CdTe NPs | DDAB-stabilized<br>CdTe NPs | DTAB-capped<br>CdTe SPs |
|-------|----------------------------|-----------------------------|-------------------------|
| Cd/Te | 8.2/1                      | 2.0/1                       | 1.7/1                   |

**Figure S4.** PL spectra of aqueous CdTe NPs in the presence of increasing amounts of  $\text{Cu}^{2+}$  (a) and  $\text{Ag}^+$  (b). The  $[\text{Cu}^{2+}]$  from A to H were 0,  $4 \times 10^{-10}$ ,  $4 \times 10^{-9}$ ,  $2 \times 10^{-8}$ ,  $4 \times 10^{-8}$ ,  $8 \times 10^{-8}$ ,  $1.4 \times 10^{-7}$ , and  $4 \times 10^{-7}$  M. The  $[\text{Ag}^+]$  from A to G were 0,  $4 \times 10^{-10}$ ,  $1 \times 10^{-8}$ ,  $4 \times 10^{-8}$ ,  $8 \times 10^{-8}$ ,  $1.2 \times 10^{-7}$ , and  $2 \times 10^{-7}$  M.

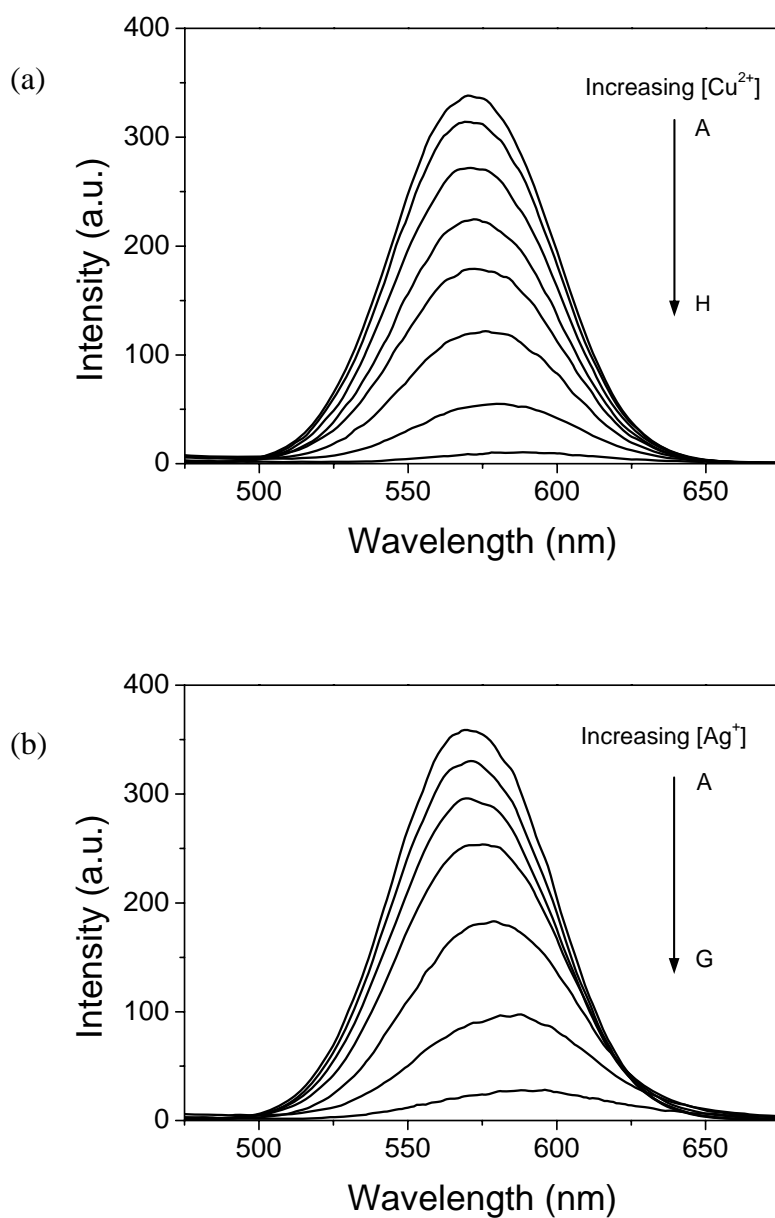

**Figure S5.** XPS Cu 3d and Ag 3d spectra of the Cu<sup>2+</sup> and Ag<sup>+</sup> bound SPs, indicating the formation of CuTe and Ag<sub>2</sub>Te.

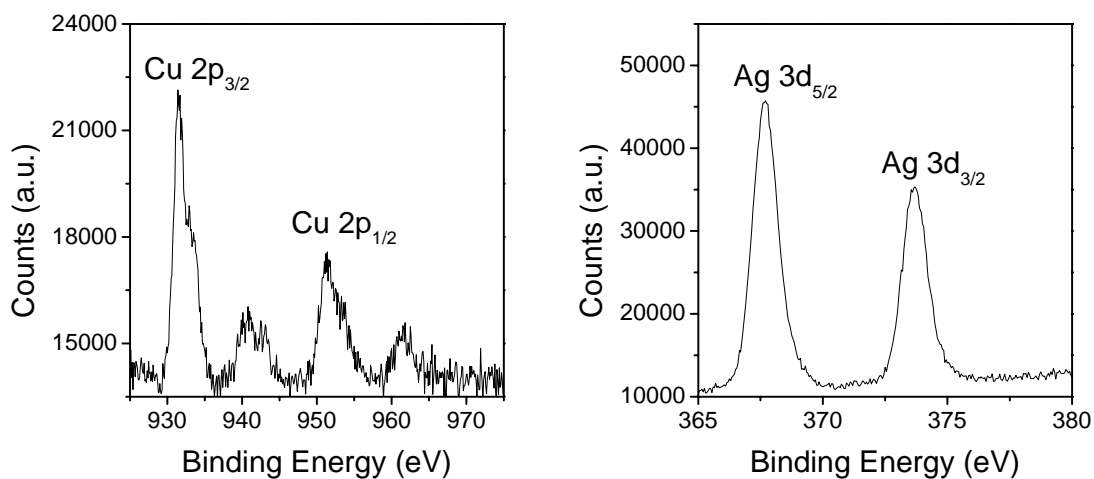

**Table S2.** The calculated Cu/Cd and Ag/Cd molar ratio of the CdTe SPs in the presence of additional Cu<sup>2+</sup> or Ag<sup>+</sup>, which was determined by the XPS measurement. To ensure the occurrence of cation exchange reaction, the concentration of Cu<sup>2+</sup> or Ag<sup>+</sup> was  $2 \times 10^{-3}$  M, which was excessive to SPs. Note that the samples for XPS measurements had been washed for three times to remove any adsorbed Cu<sup>2+</sup> or Ag<sup>+</sup>. So, the XPS results firmly proved the formation of CuTe and Ag<sub>2</sub>Te in the SPs.

|             | Cu/Cd  | Ag/Cd  |
|-------------|--------|--------|
| molar ratio | 0.20/1 | 0.36/1 |

**Figure S6.** Relative PL intensity ( $I_0/I$ ) of CdTe SPs as a function of  $[\text{Cu}^{2+}]$  (a) and  $[\text{Ag}^+]$  (b). Nonlinear correlation was revealed. The corresponding PL spectra of CdTe SPs were indicated in Figure 5.

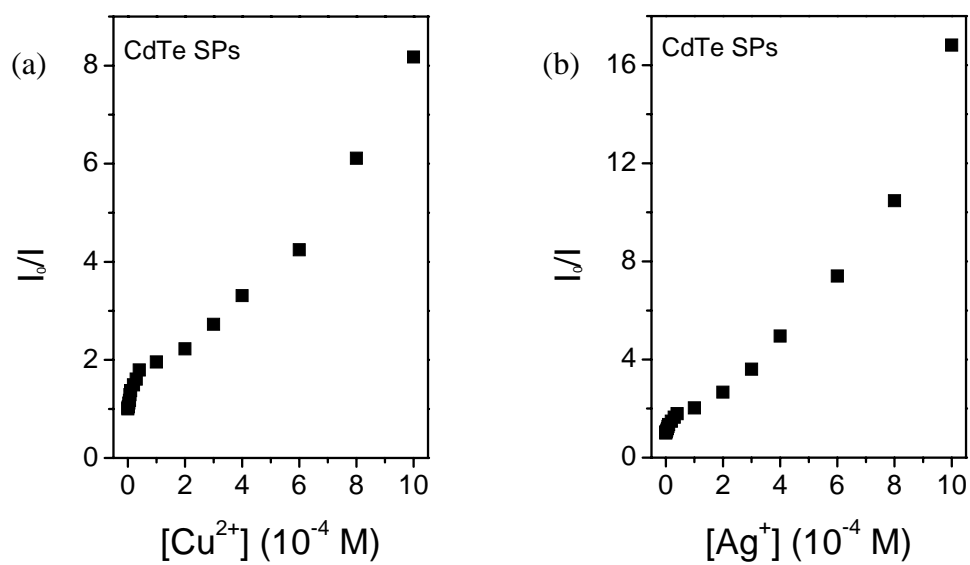

**Figure S7.** Relative PL intensity ( $I_0/I$ ) of CdTe SPs as a function of  $[\text{Cu}^{2+}]$  (a) and  $[\text{Ag}^+]$  (b) at low metal ionic concentration ( $10^{-7}$  to  $10^{-5}$  M). The corresponding PL spectra of CdTe SPs were indicated in Figure 5.

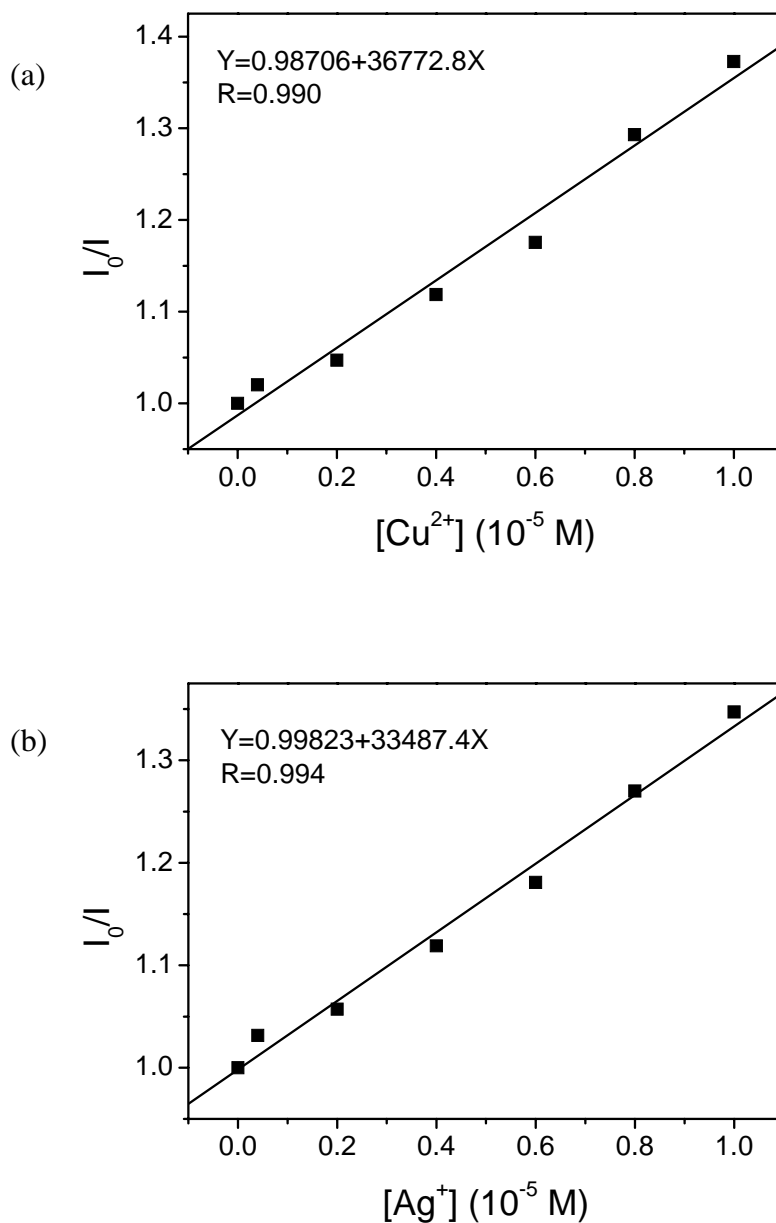

**Stern-Volmer equation:**

$$\frac{F_0}{F} = 1 + K_{sv}[Q]$$

Where  $F_0$  and  $F$  are the fluorescence intensities in the absence and presence of quencher,  $K_{sv}$  is the Stern-Volmer quenching constant, and  $Q$  is the concentration of quencher.

In the detection of  $\text{Cu}^{2+}$  or  $\text{Ag}^+$ , eliminating agents could be also used to avoid the effect of competitive ions (in Figure 7). For example, in practical application,  $\text{Pb(II)}$  ions in the mixture were eliminated by thioglycolic acid (TGA). TGA cooperated with  $\text{Pb(II)}$  ions strongly and form  $\text{Pb-TGA}$  complex, without affecting detected  $\text{Cu}^{2+}$  and  $\text{Ag}^+$ .
